# Supplementary material for: Clustergrammer, a web-based heatmap visualization and analysis tool for high-dimensional biological data
Source: PubMed Central journal article supplement (PMC5634325; doi:10.1038/sdata.2017.151), 2017-10-10
Supplement: sdata2017151-s1.pdf [file sdata2017151-s1.pdf]

## Supplementary Information for:

### **Clustergrammer, a web-based heatmap visualization and analysis tool for high-dimensional biological data**

Nicolas F. Fernandez<sup>1</sup>, Gregory W. Gundersen<sup>1</sup>, Adeeb Rahman<sup>2</sup>, Mark L. Grimes<sup>3</sup>, Klarisa Rikova<sup>4</sup>, Peter Hornbeck<sup>4</sup>, Avi Ma'ayan<sup>1,\*</sup>

<sup>1</sup>Department of Pharmacological Sciences, Mount Sinai Center for Bioinformatics, BD2K-LINCS Data Coordination and Integration Center (DCIC), Icahn School of Medicine at Mount Sinai, New York, NY 10029, USA

<sup>2</sup>Human Immune Monitoring Core, Icahn School of Medicine at Mount Sinai, New York, NY 10029, USA

<sup>3</sup>Center for Structural and Functional Neuroscience, University of Montana, Missoula, MT 59812, USA

<sup>4</sup>Cell Signaling Technology Inc., Danvers, MA 01923, USA

\*To who correspondence should be addressed: [avi.maayan@mssm.edu](mailto:avi.maayan@mssm.edu)

# A

## Cell Line

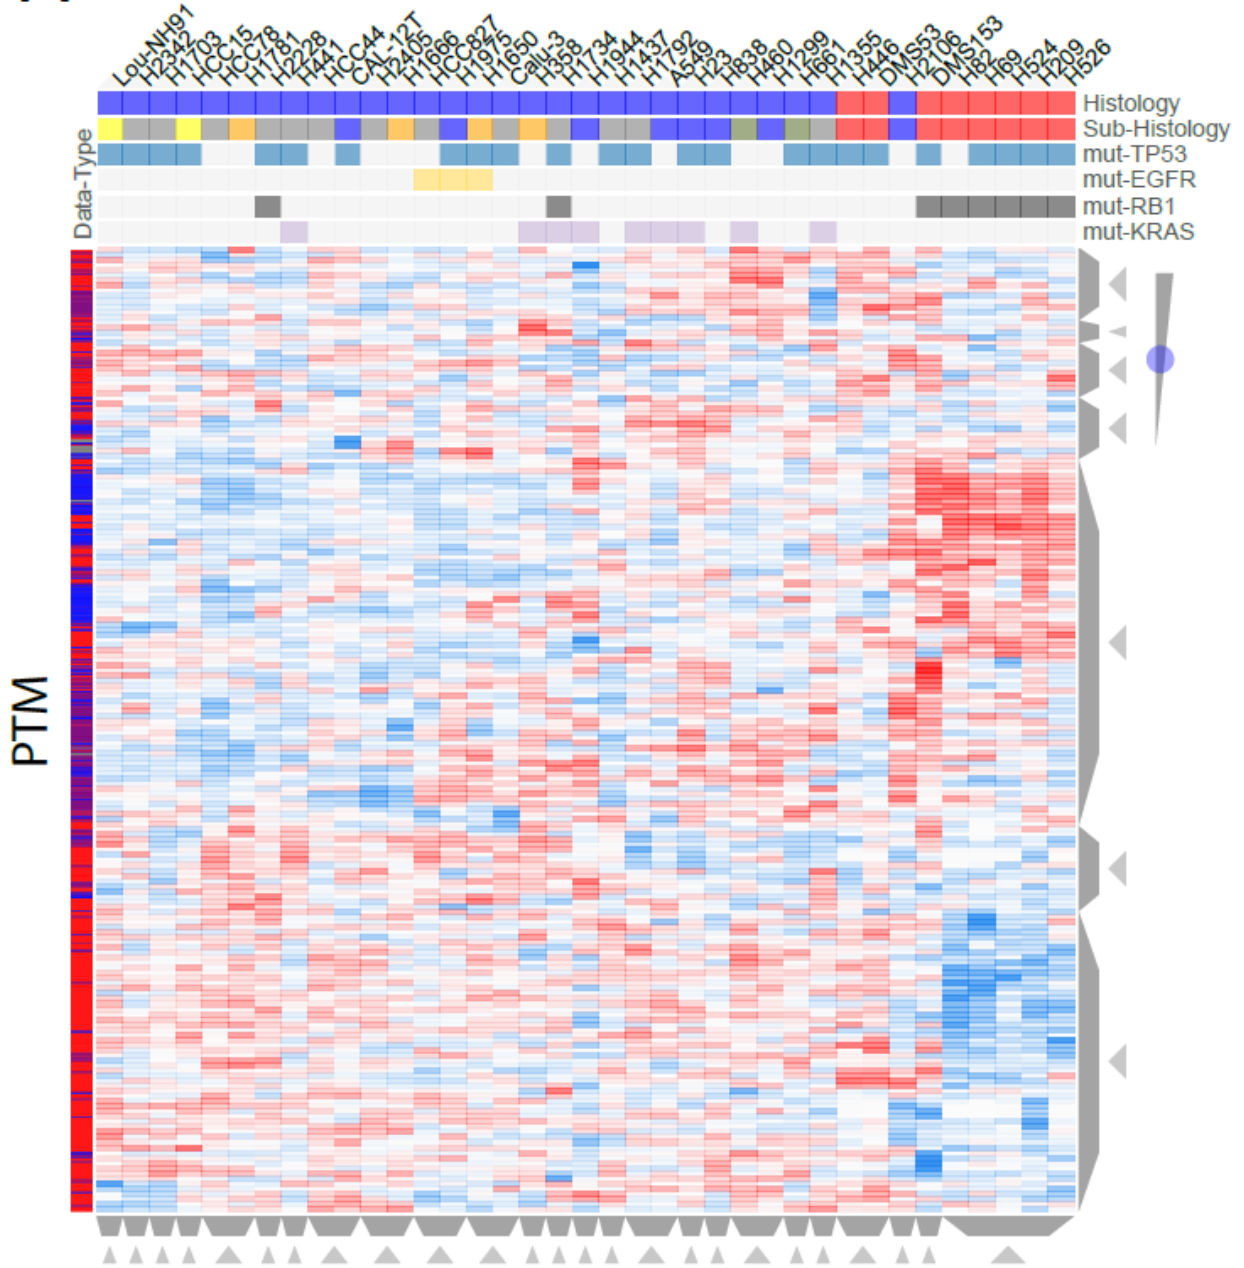

**B**

Cell Line

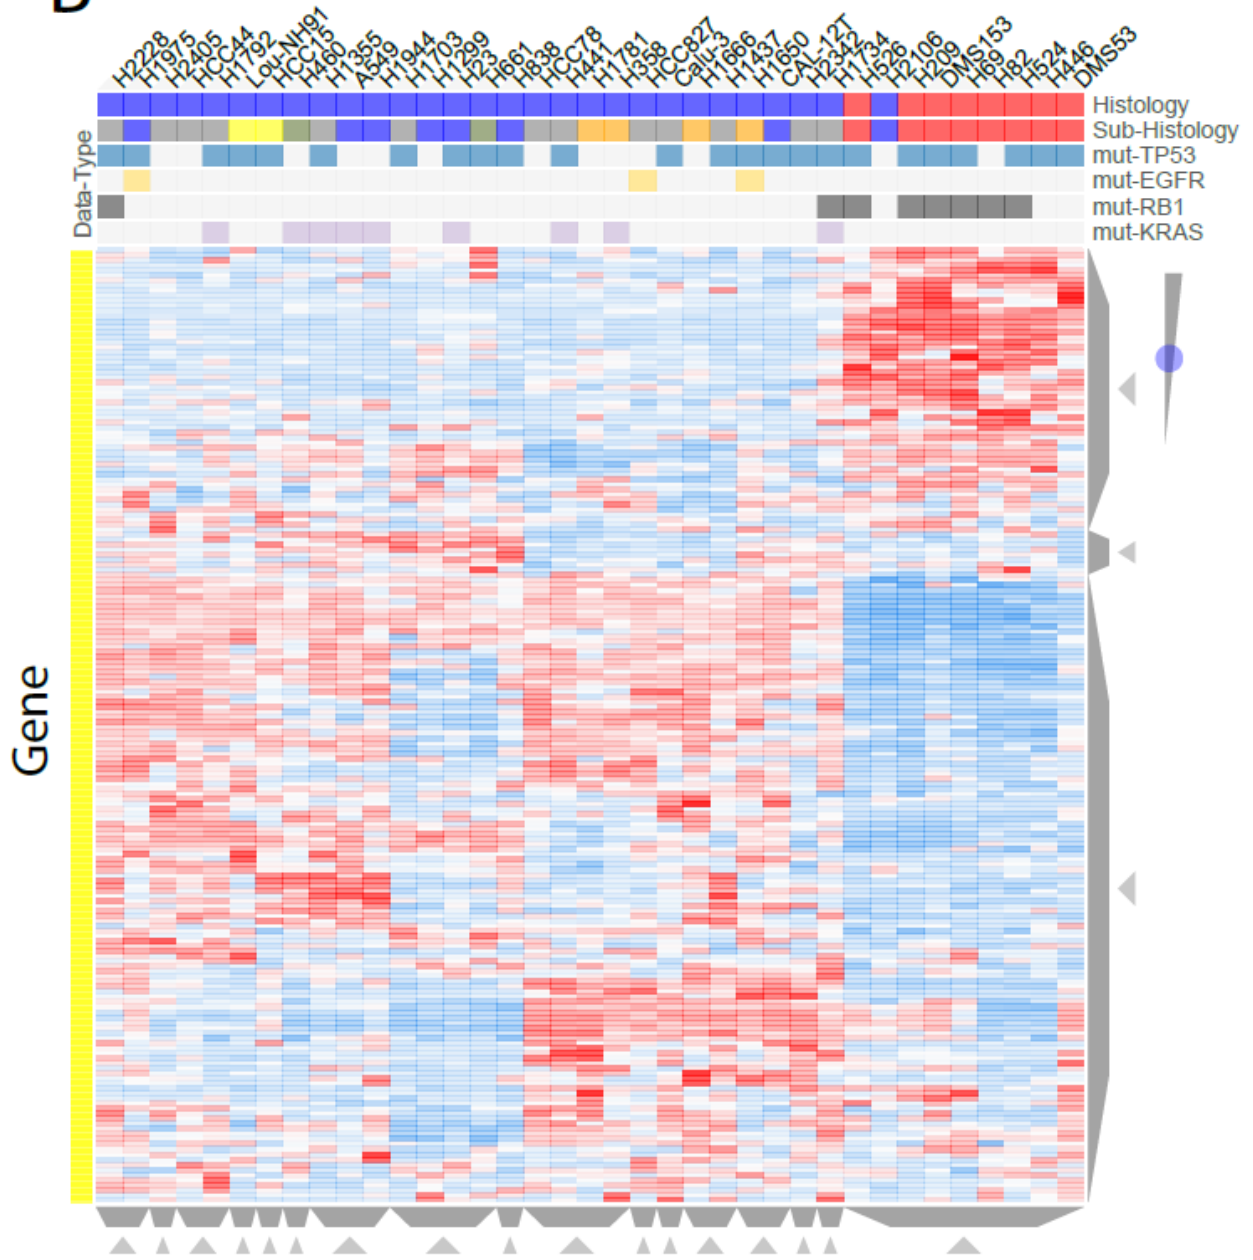

C

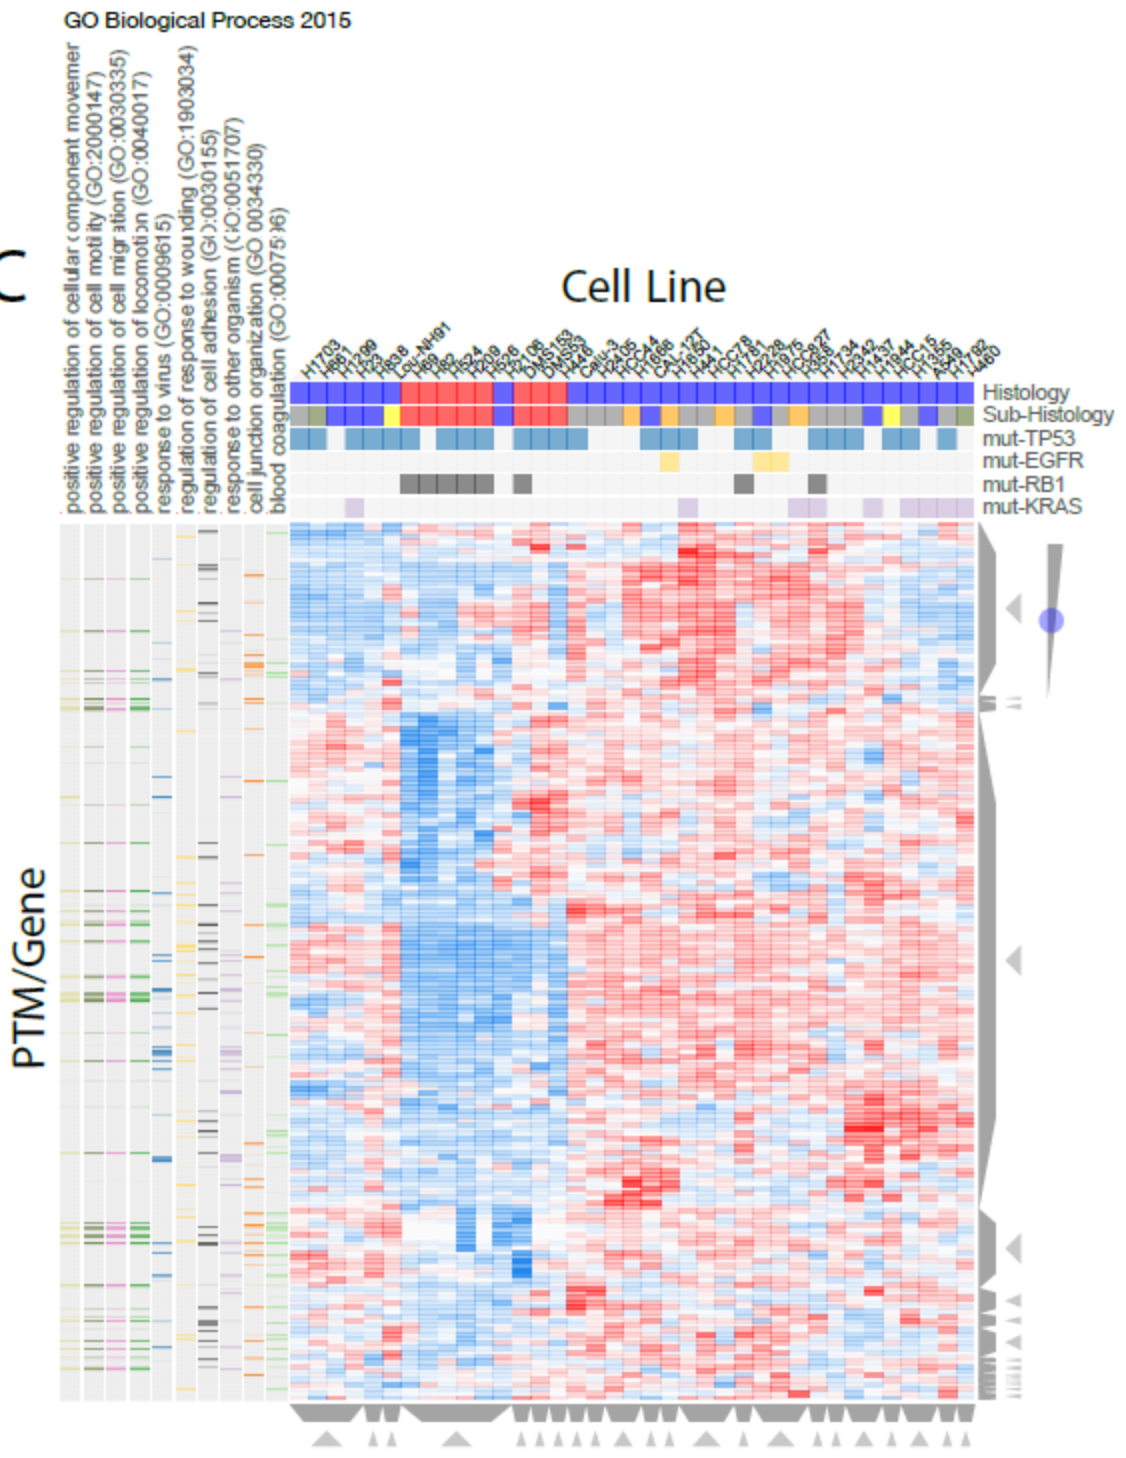

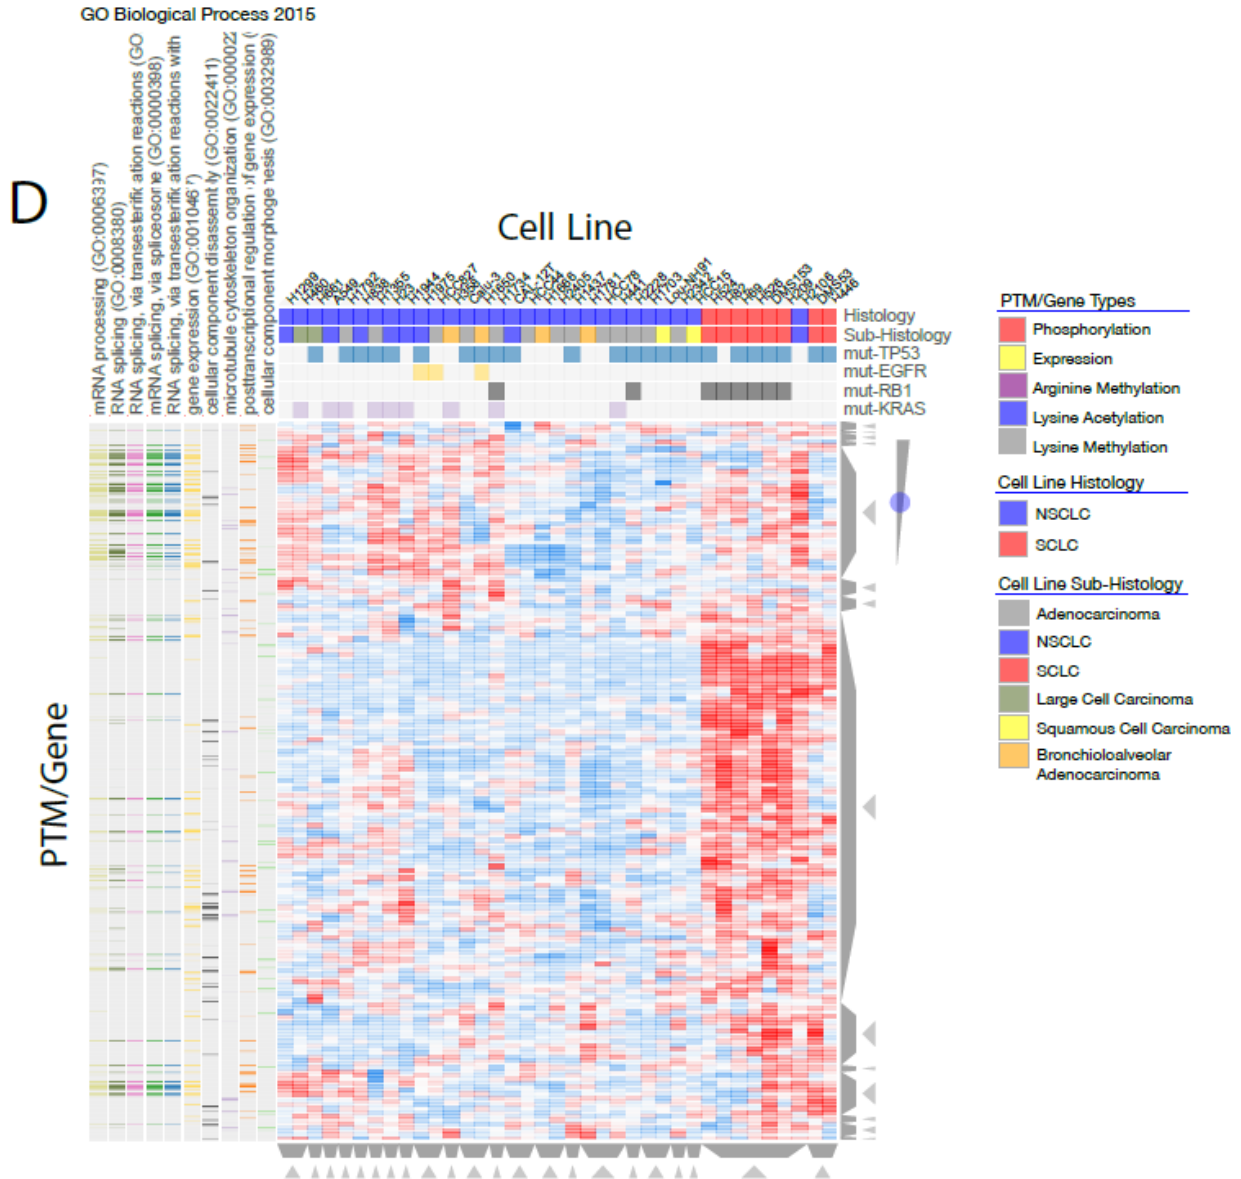

**Supplementary Fig. 1. Lung cancer post-translational modifications and gene expression regulation.** (a) Lung cancer cell lines (columns) were clustered based on PTM data, and (b) gene expression data. Data type is indicated using row categories. (c) Enrichment analysis of the NSCLC up-regulated PTM/gene cluster using the Gene Ontology Biological library. (d) Enrichment analysis of the SCLC up-regulated PTM/gene cluster using the Gene Ontology Biological library.

A

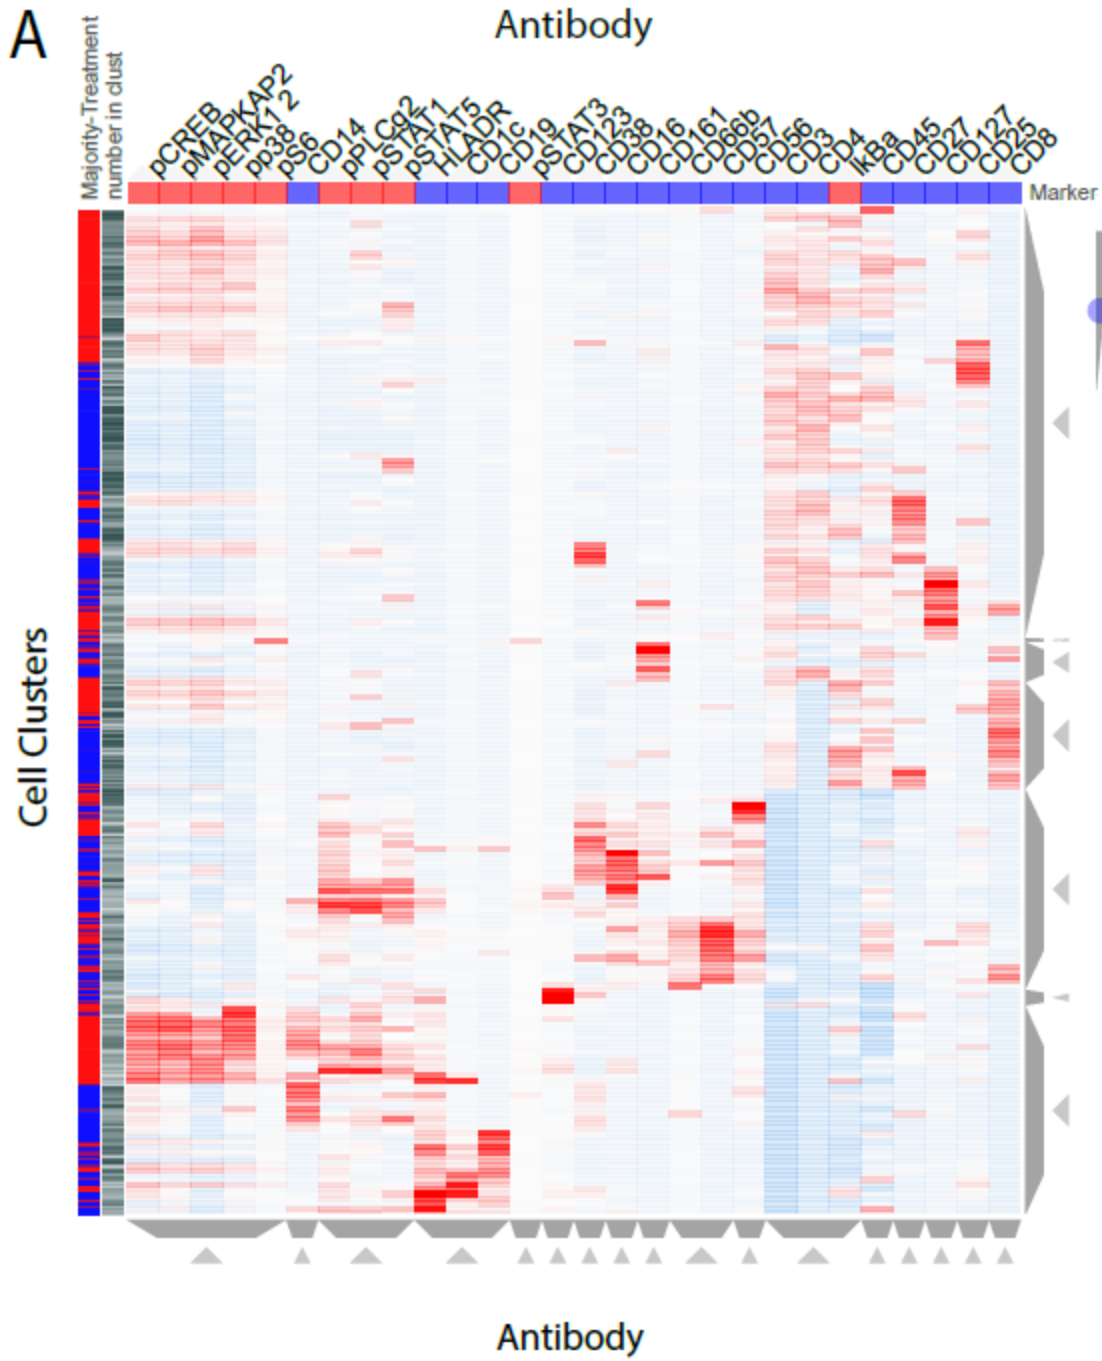

B

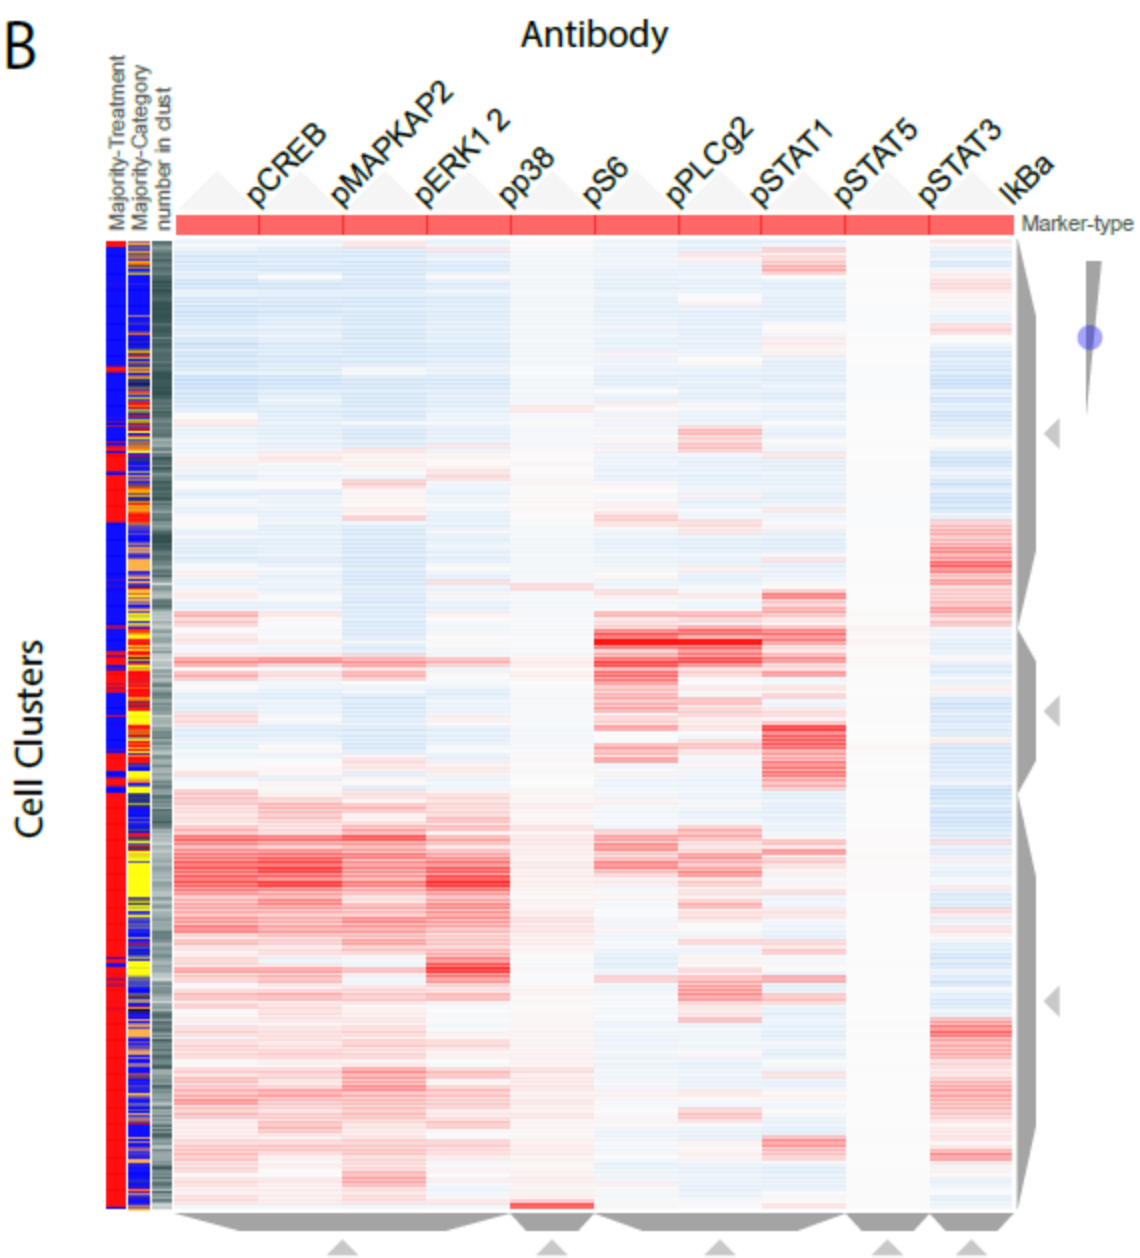

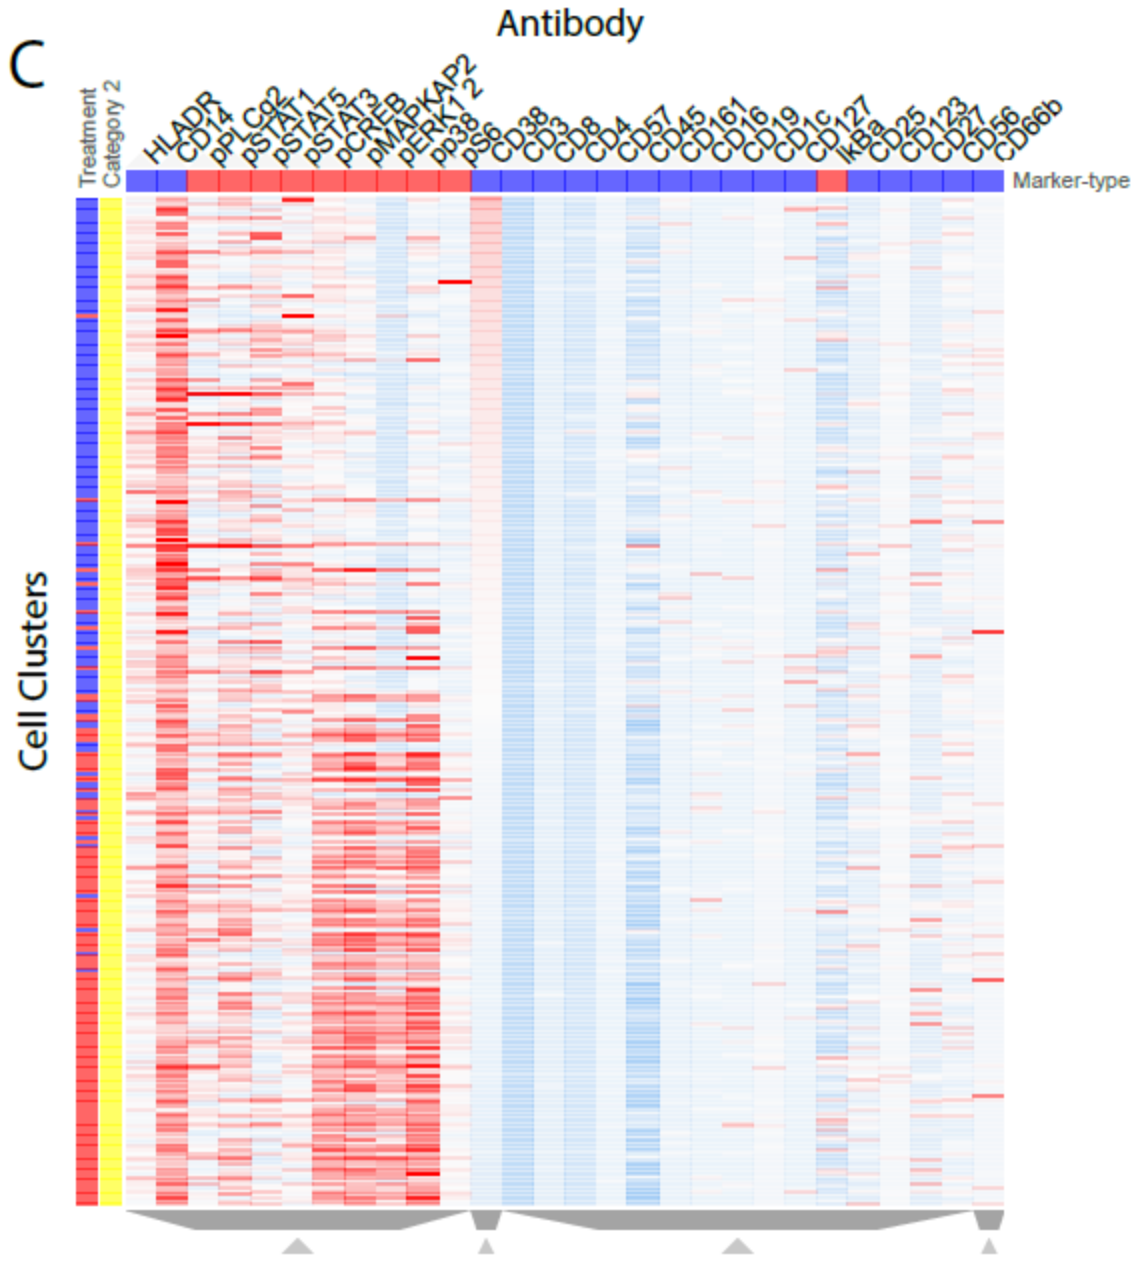



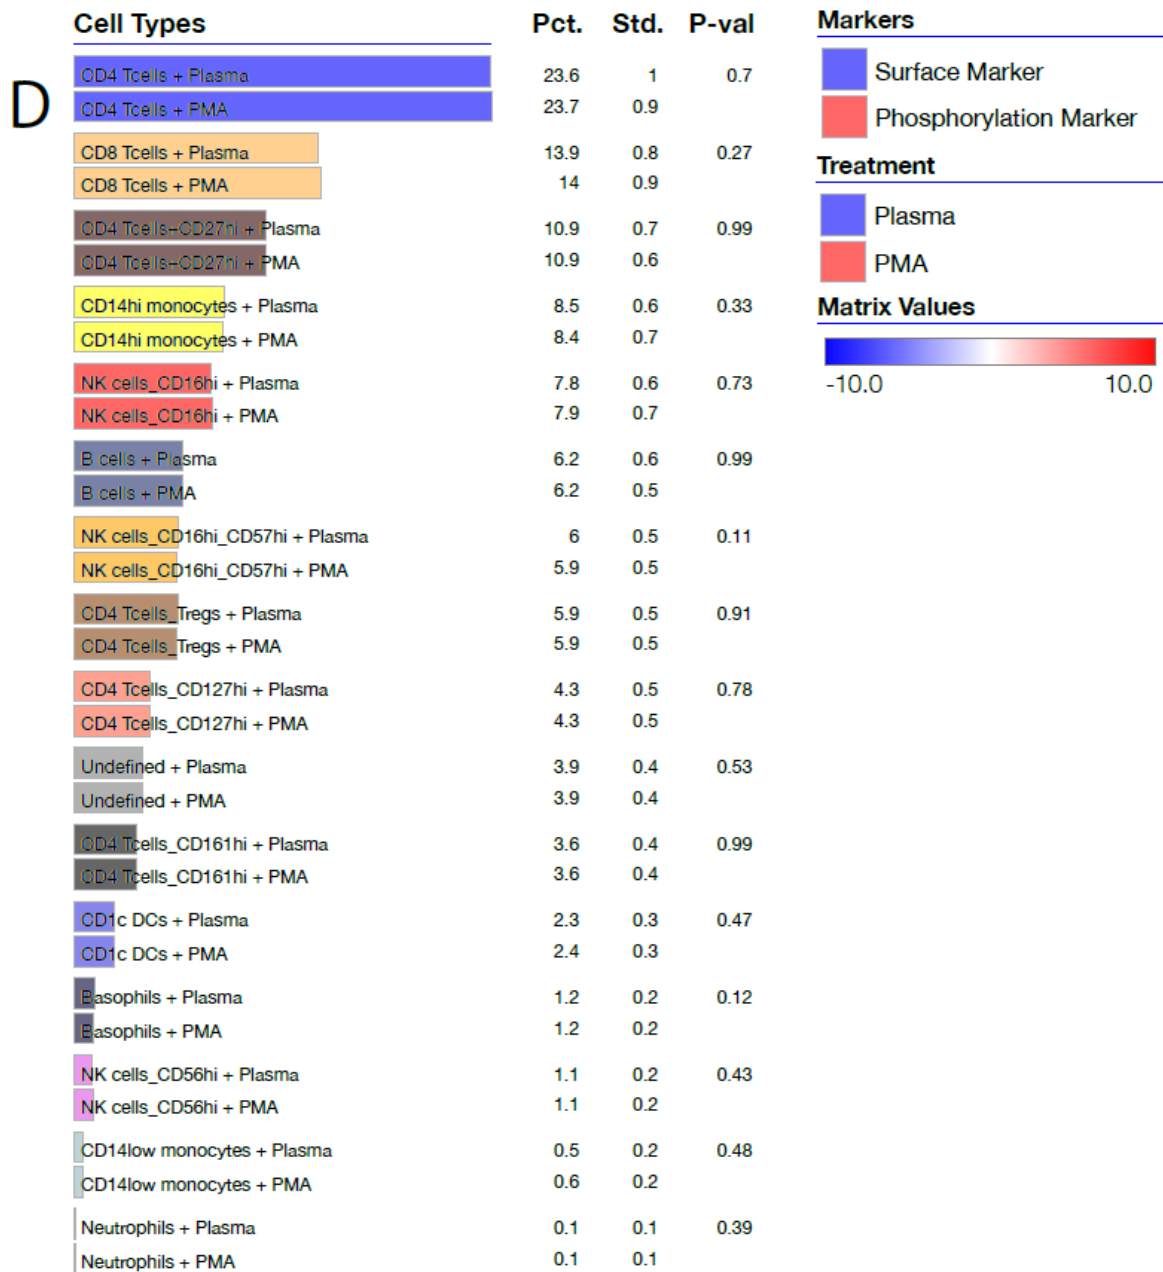

**Supplementary Fig. 2. Single blood cells response to PMA treatment CyTOF Data.** (a) Single cell CyTOF data was obtained after exposing PBMCs to PMA. Data is visualized using a clustergram with markers as columns (surface markers: red, phospho-markers: blue) and cells as rows (PMA treated: red, non-treated: blue). (b) K-means downsampling was used to obtain an overview of the cells in phosphorylation space after cell-type labeling (110,000 PMA and 110,000 non-treated single cells). Cell-clusters are shown as rows (clusters are defined using K-means downsampling and the cluster size is indicated using the third row category) and the majority cell-type is shown as the second row category. (c) Reordering CD14hi monocytes (isolated from subsampling) based on the surface marker CD38 level almost completely separates PMA treated cells from Plasma treated. (d) Cell population distribution with or without exposure to PMA.

A

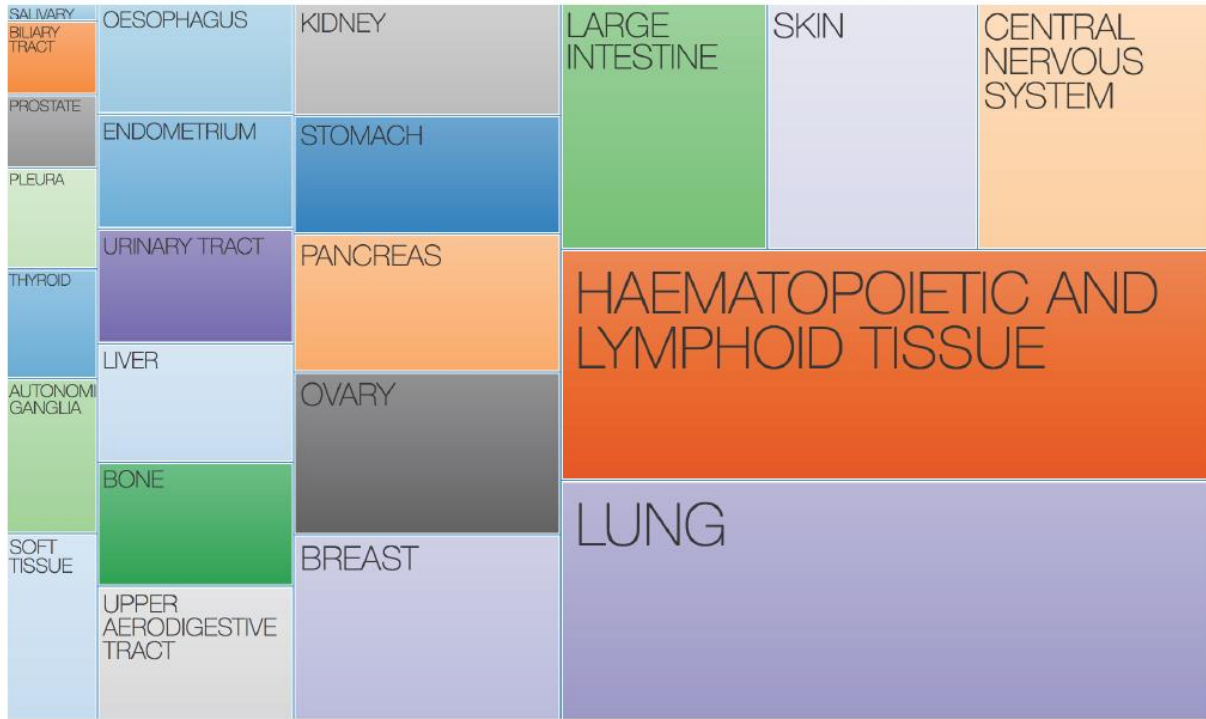

B

Cell Line Clusters

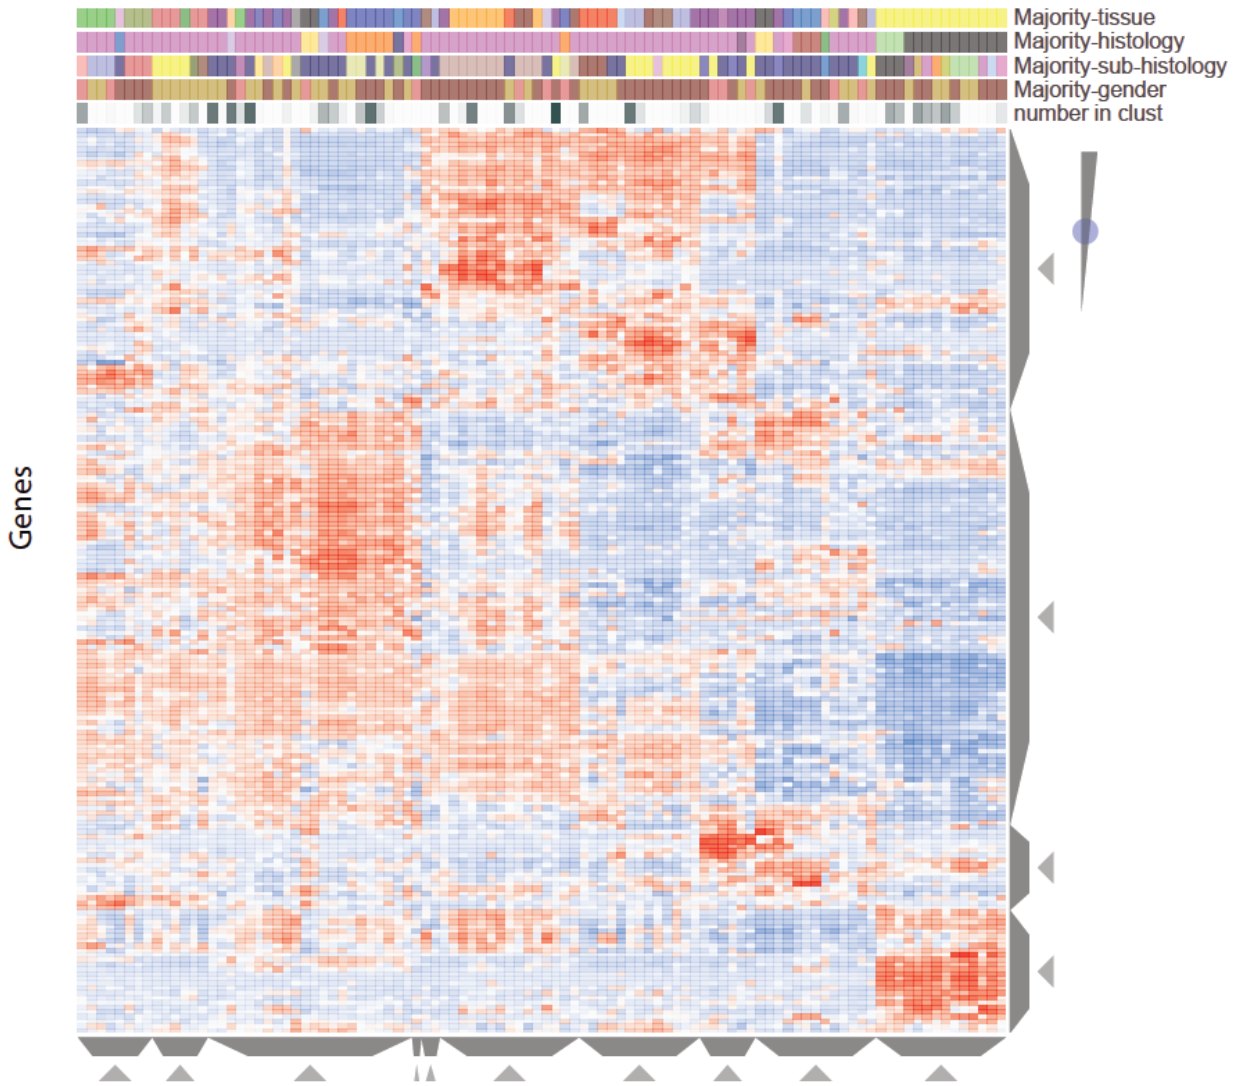

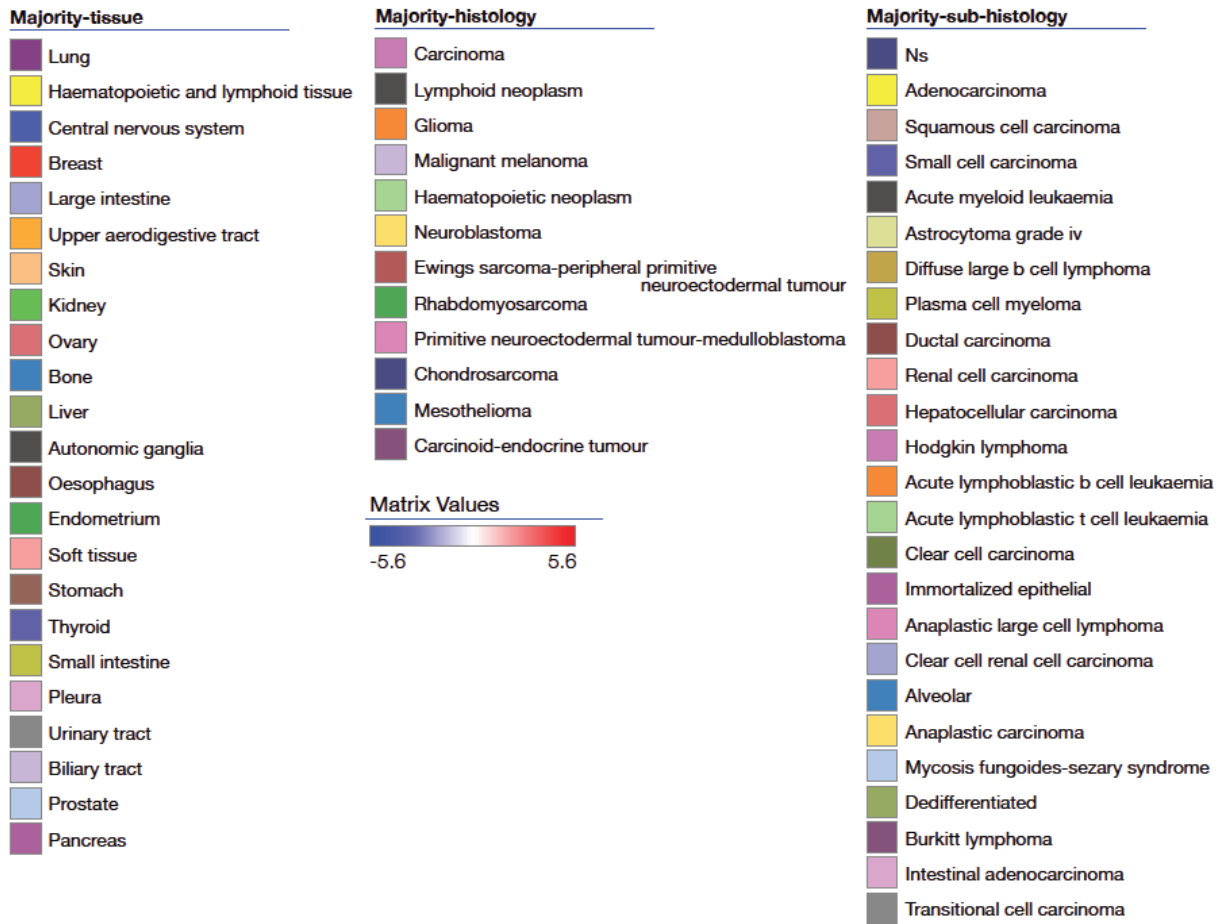

**Supplementary Fig. 3. Cancer cell line encyclopedia (CCLE) gene expression data.** (a) The CCLE Explorer available at [https://maayanlab.github.io/CCLE\\_Clustergrammer/](https://maayanlab.github.io/CCLE_Clustergrammer/) allows users to explore tissue expression using a TreeMap visualization where the size of a tissue reflects the number of cell lines originating from a tissue. Clicking on a tissue tile displays a heatmap of the top 250 most variably expressed genes within the tissue after Z-score normalization across the rows (genes) for the cell lines within the tissue. (b) K-means downsampling to generate 100 cell line clusters, and filtering to keep the top 1000 variable genes, was implemented to obtain a visualization of the entire CCLE dataset.
